# Supplementary material for: Synthesis, crystal structure and bio-macromolecular interaction studies of pyridine-based thiosemicarbazone and its Ni(ii) and Cu(ii) complexes
Source: Royal Society of Chemistry journal article supplement (doi:10.1039/c3ra40904j), 2013-01-01
Supplement: c3ra40904j.pdf [file c3ra40904j.pdf]

## Electronic Supplementary Information

# Synthesis, Crystal structure and Bio-macromolecular interaction studies of pyridine-based thiosemicarbazone and its Ni(II) and Cu(II) complexes

*Arghya Basu<sup>a</sup>, Durairaj Thiyagarajan<sup>b</sup>, Chirantan Kar<sup>a</sup>, Aiyagari Ramesh<sup>b\*</sup> and Gopal Das<sup>a\*</sup>*

*<sup>a</sup>Department of Chemistry and <sup>b</sup>Department of Biotechnology*

*Indian Institute of Technology, Guwahati*

*E-mail: aramesh @iitg.ernet.in*

*E-mail: gdas@iitg.ernet.in*

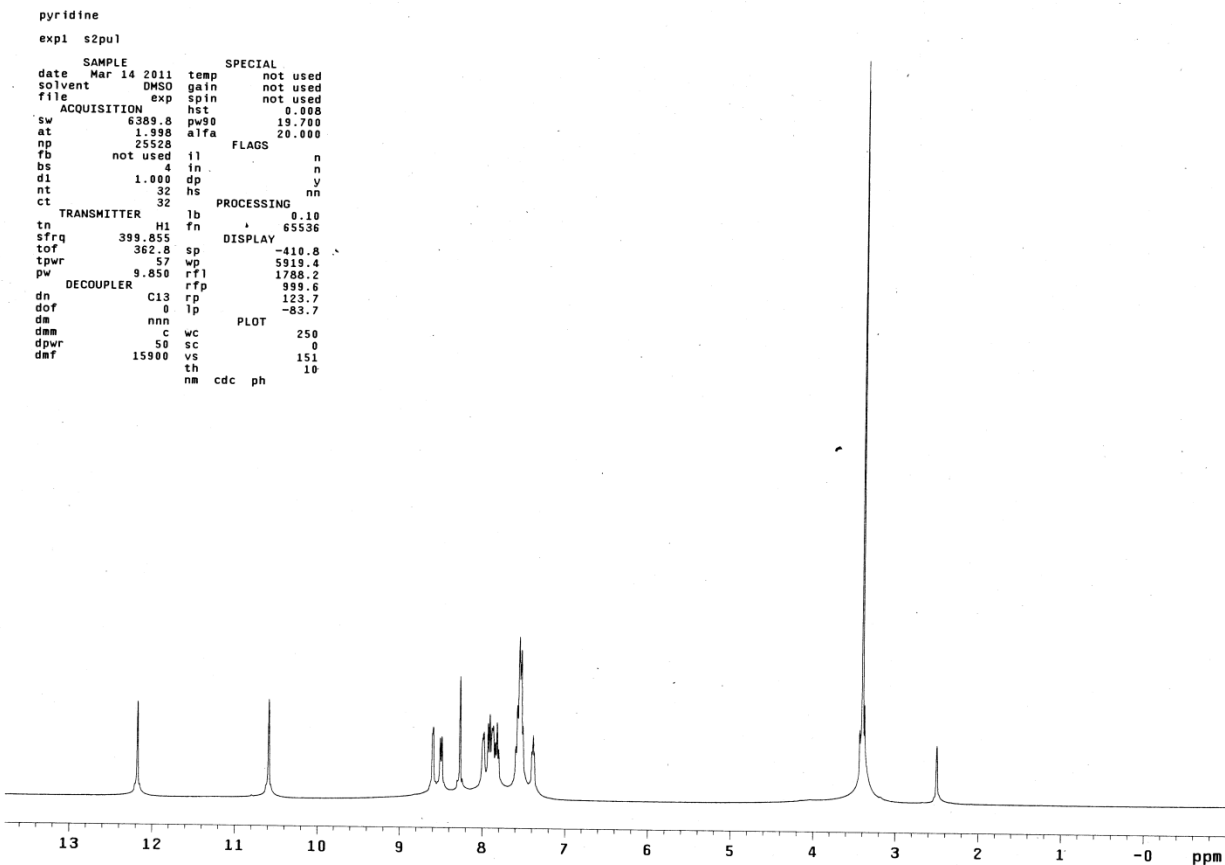

**Fig.S1**  $^1\text{H}$ NMR spectrum of LH.

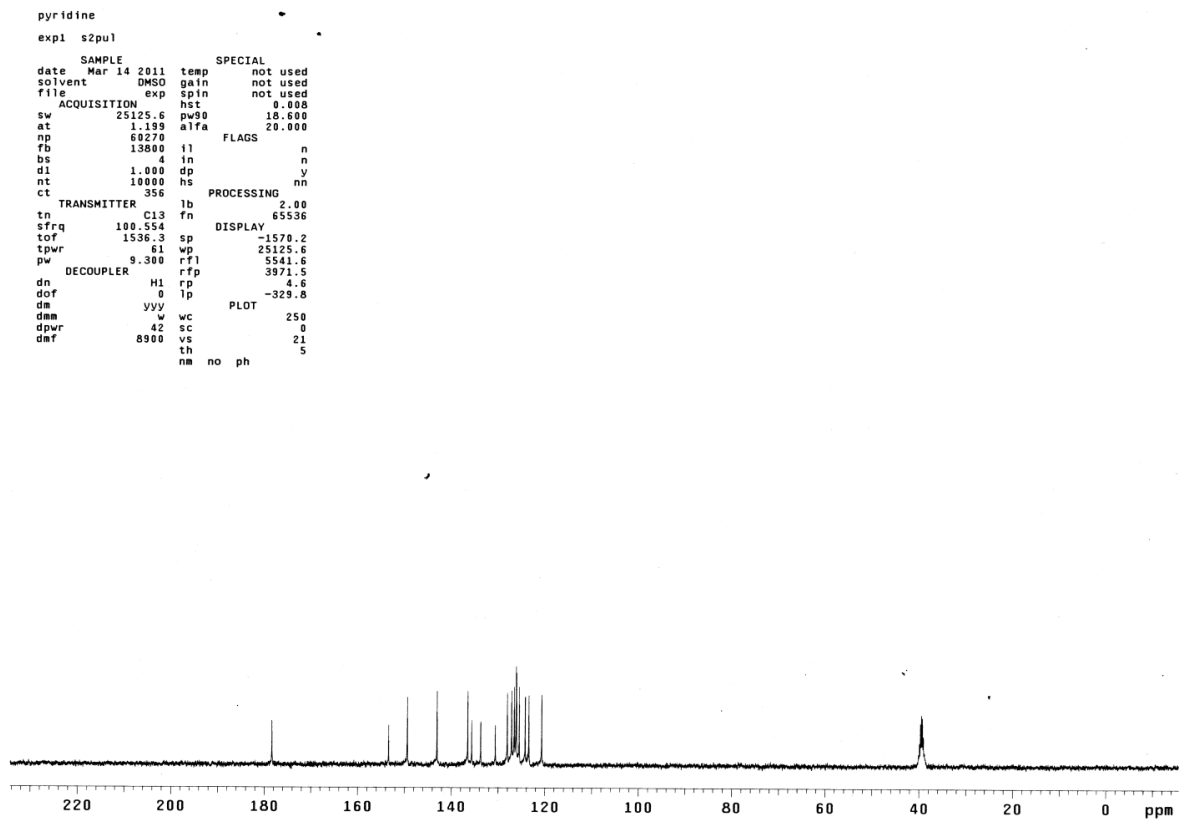

**Fig.S2**  $^{13}\text{C}$ -NMR spectrum of LH.

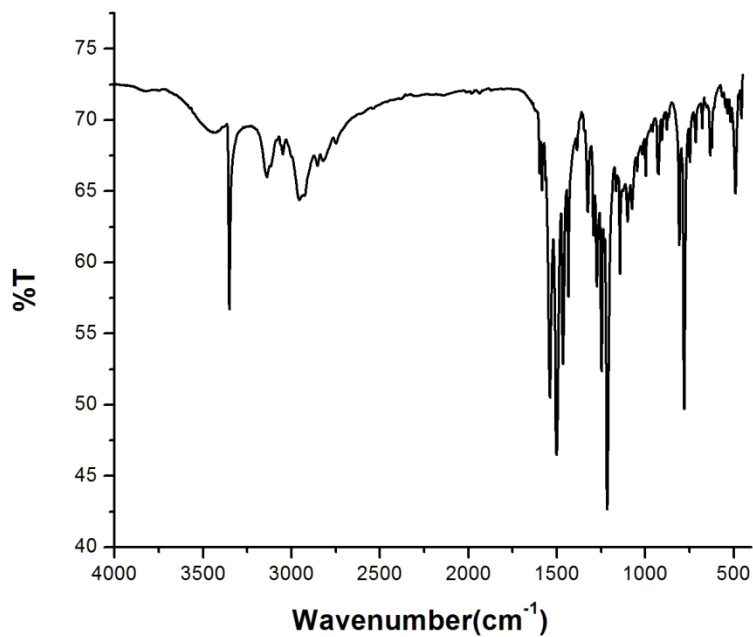

**Fig.S3** IR-spectrum of LH.

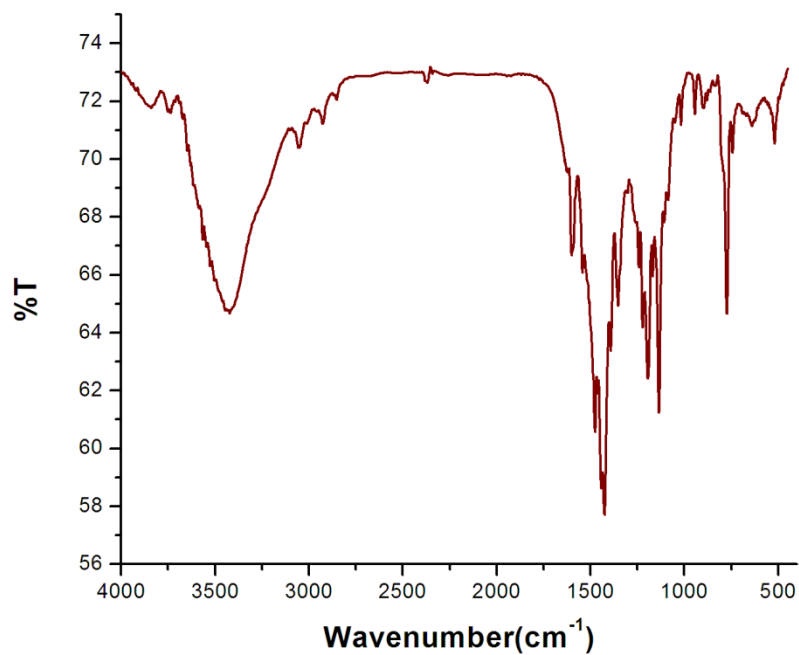

**Fig.S4** IR-spectrum of Cu(L)Cl.

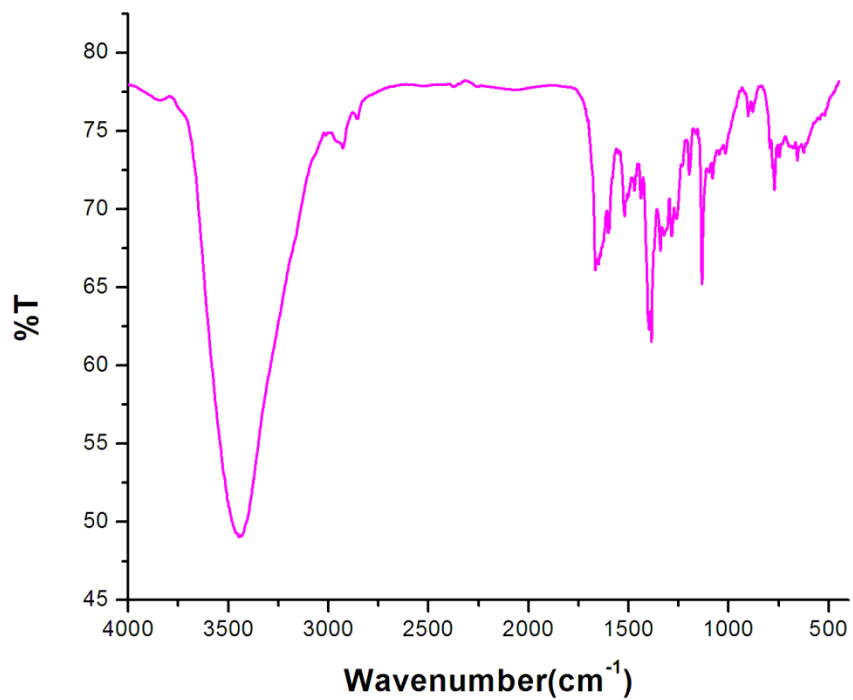

**Fig.S5** IR-spectrum of Ni(L)<sub>2</sub>.

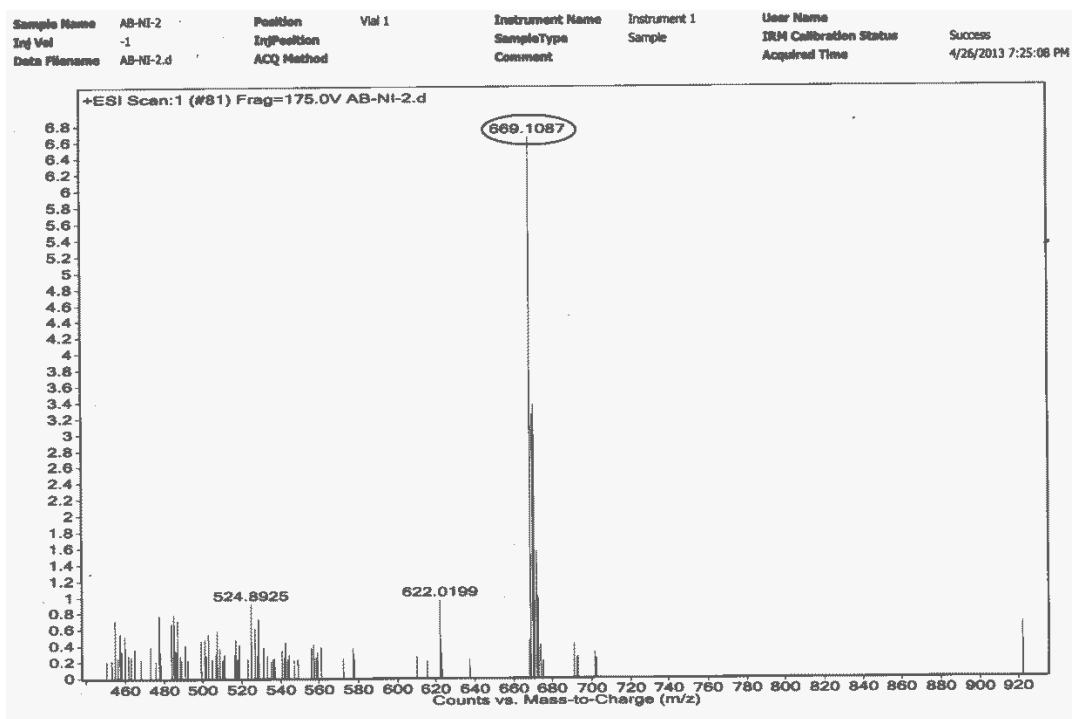

Fig. S6 Mass Spectrum of Ni(L)<sub>2</sub>

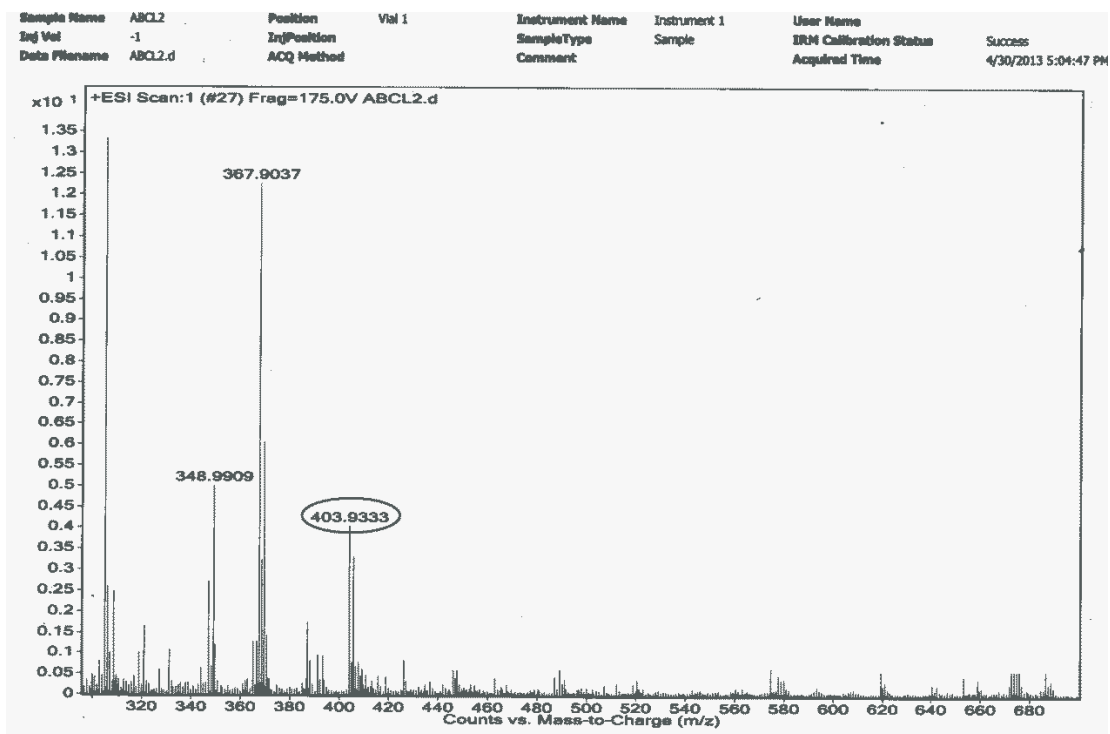

Fig. S7 Mass Spectrum of Cu(L)Cl

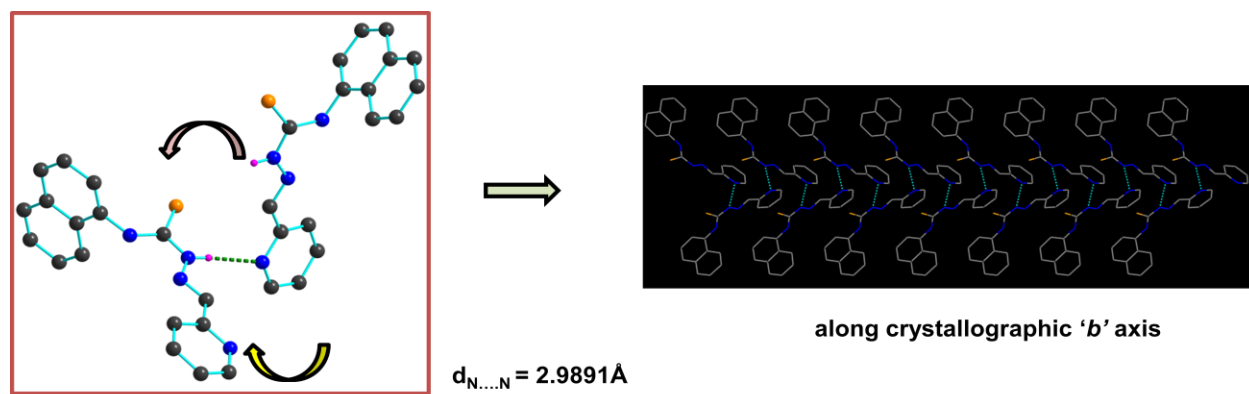

**Fig. S8** Hydrogen bond directed packing diagram of ligand LH.

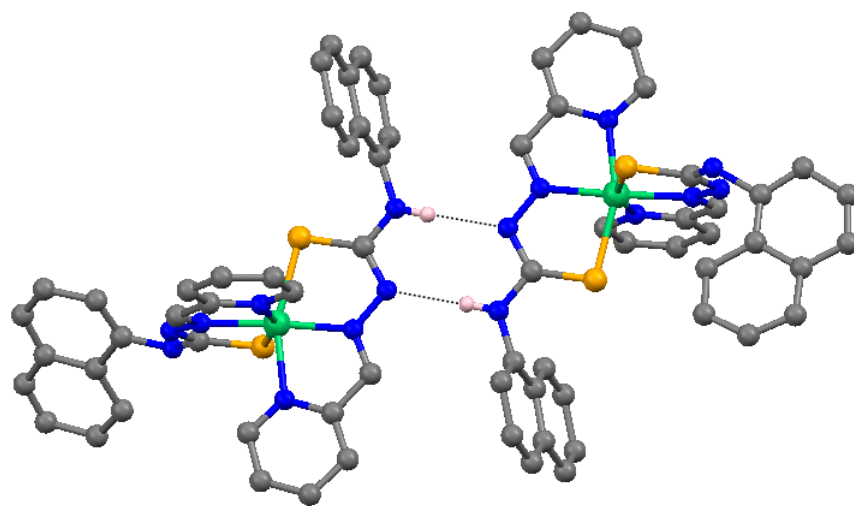

**Fig. S9** Dimeric hydrogen bond integration between two Ni(II) complexes.

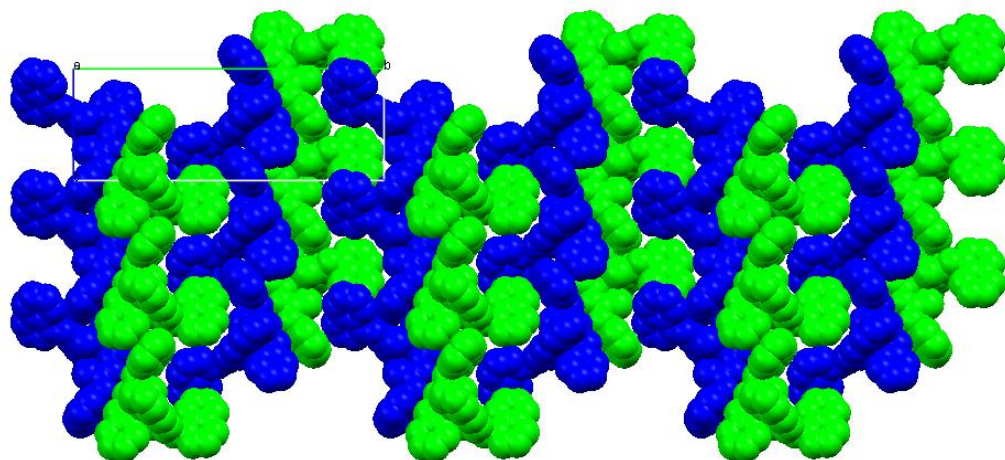

**Fig. S10** Packing diagram of Ni(L)<sub>2</sub> along *a* axis. Solvent molecules are omitted for clarity.

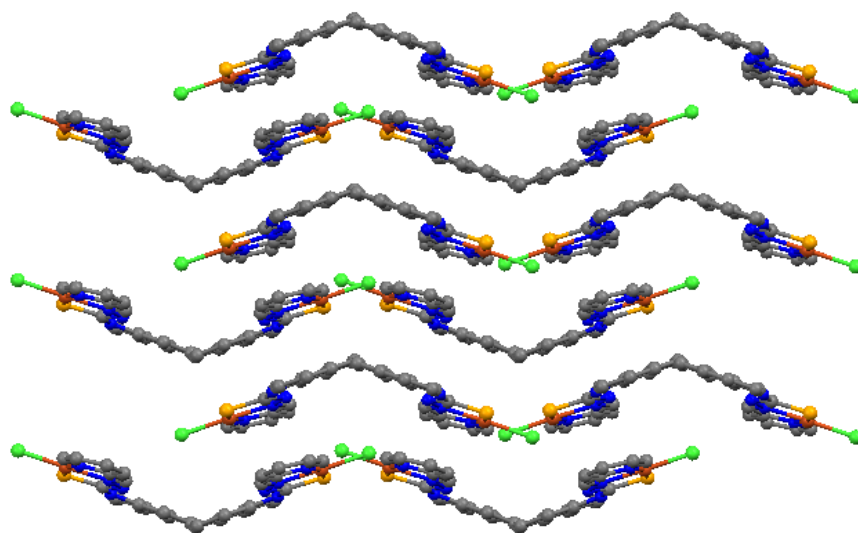

**Fig. S11** Packing diagram of Cu(L)Cl along *c* axis.

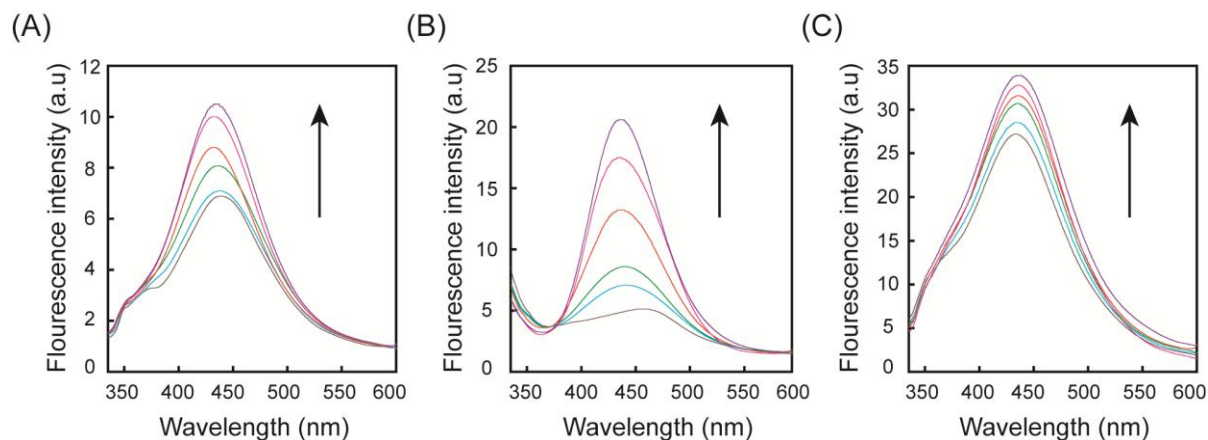

**Fig. S12** Fluorescence titration spectra of (A) Compound 1, (B) Compound 2 and (C) Compound 3 with various concentration (6 $\mu$ M – 30 $\mu$ M) of CT DNA in PBS pH 7.4.

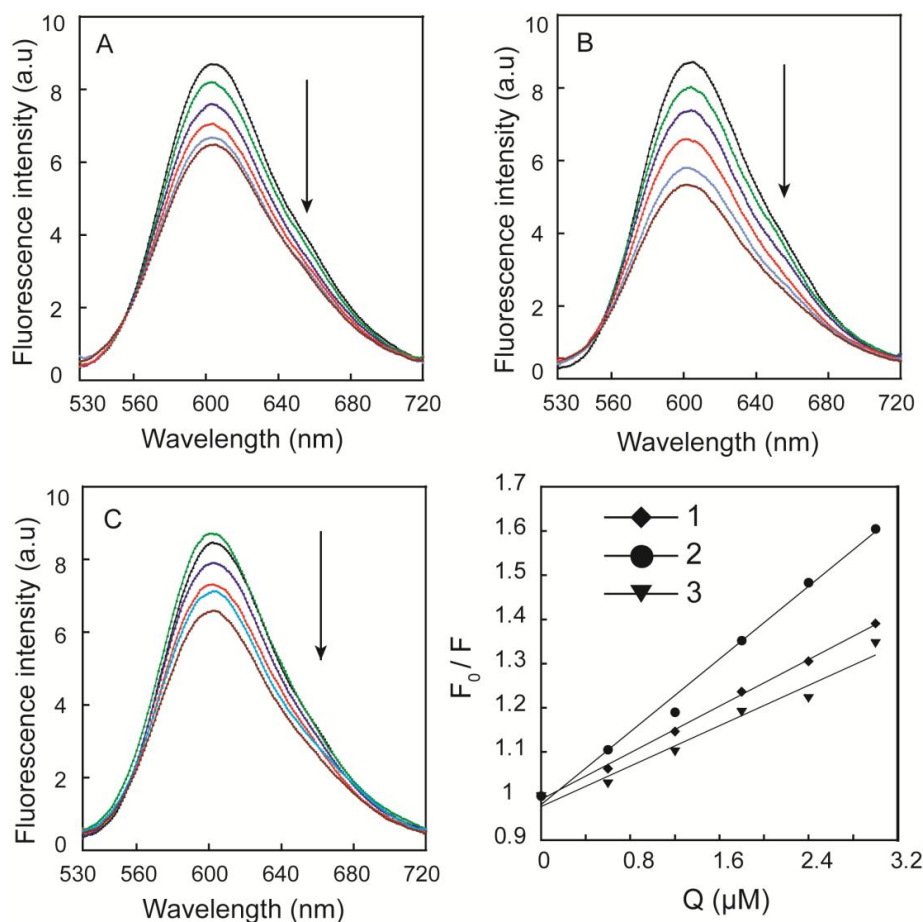

**Fig. S13** Fluorescence quenching curves of ethidium bromide bound to CT-DNA by Compound 1(A), Compound 2(B) and Compound 3(C). [DNA] = 3 $\mu$ M, [EB] = 0.5  $\mu$ M and [Compound] = 0.6  $\mu$ M - 3.0  $\mu$ M. (D) Stern-Volmer plots of the fluorescence quenching by compounds.



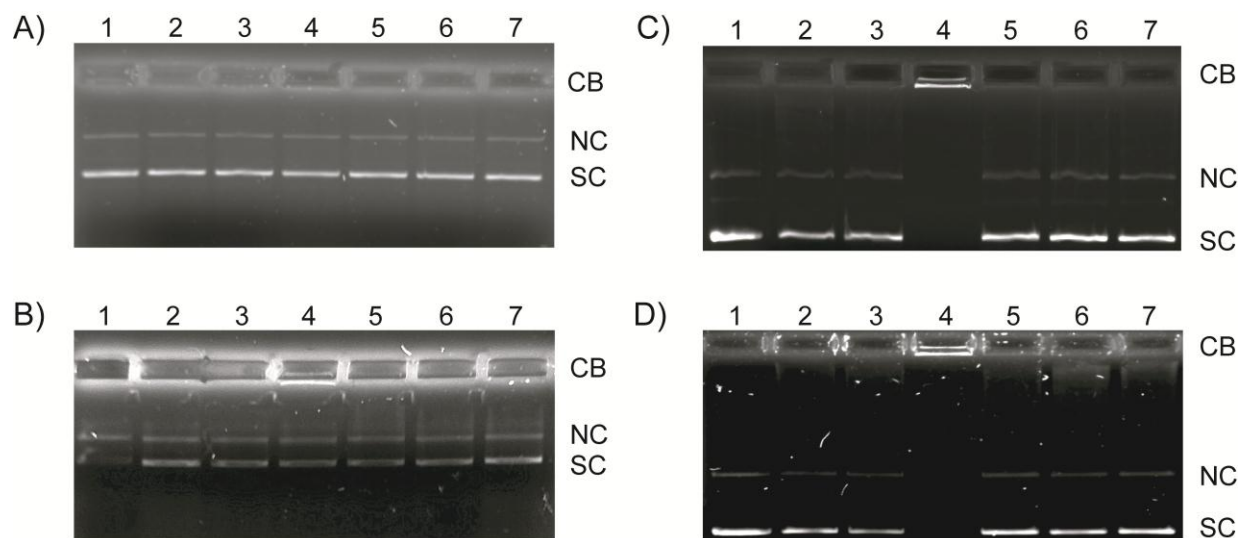

**Fig. S14** Agarose gel electrophoresis to study pUC18 plasmid DNA cleavage activity of test compounds. Treatment of pUC18 plasmid DNA with 60  $\mu\text{M}$  compound concentration was performed for (A) 1h and (B) 2h. Treatment of pUC18 plasmid DNA with 180  $\mu\text{M}$  compound concentration was performed for (C) 1h and (D) 2h. Lanes: 1: untreated pUC18 plasmid DNA; 2: compound 1-treated, 3: compound 2-treated, 4: compound 3-treated, 5: Ni salt control; 6: Cu salt control; 7: DMSO control. CB: compound bound plasmid DNA; NC: nicked circular plasmid DNA, SC: super coiled plasmid DNA.

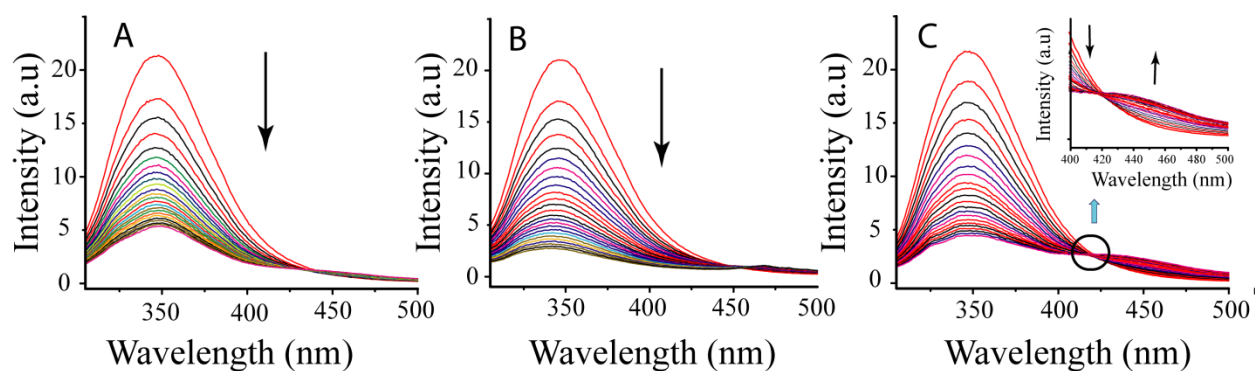

**Fig. S15** Emission spectrum of BSA (1  $\mu\text{M}$ ;  $\lambda_{\text{exi}} = 295 \text{ nm}$ ;  $\lambda_{\text{em}} = 345 \text{ nm}$ ) in the presence of increasing amounts of (A) compound 1, (B) compound 2 and (C) compound 3. The amount of the compounds was in the range of 0  $\mu\text{M}$  - 40  $\mu\text{M}$ .

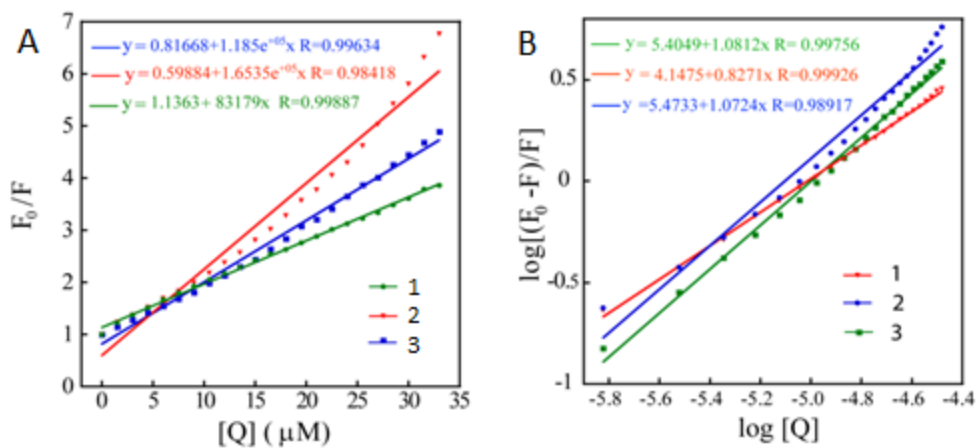

**Fig. S16** (A) Stern–Volmer plot of BSA fluorescence titration for compound 1–3. (B) Scatchard plot of BSA fluorescence titration for compound 1–3.

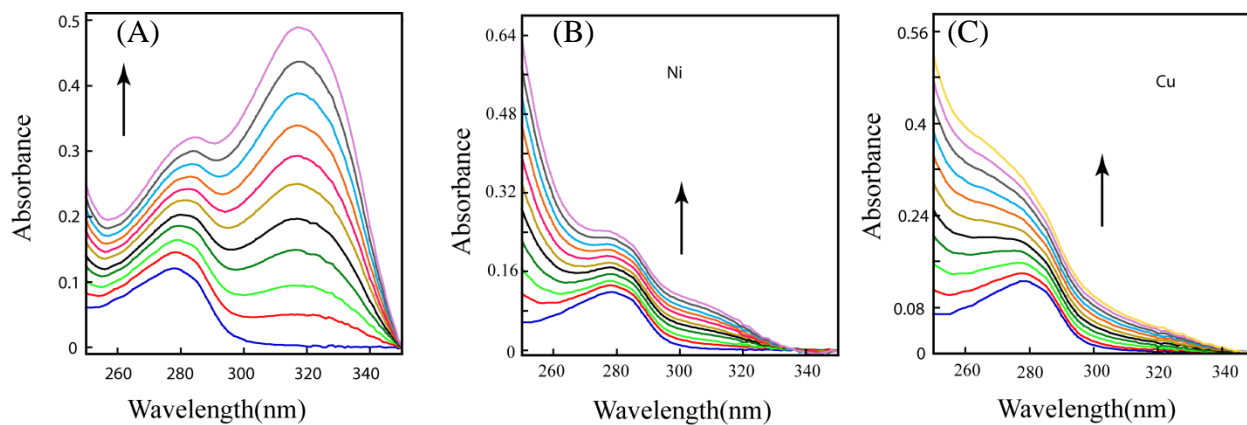

**Fig. S17** UV-vis spectra of BSA in the presence of increasing amounts of (A) compound 1, (B) compound 2 and (C) compound 3.

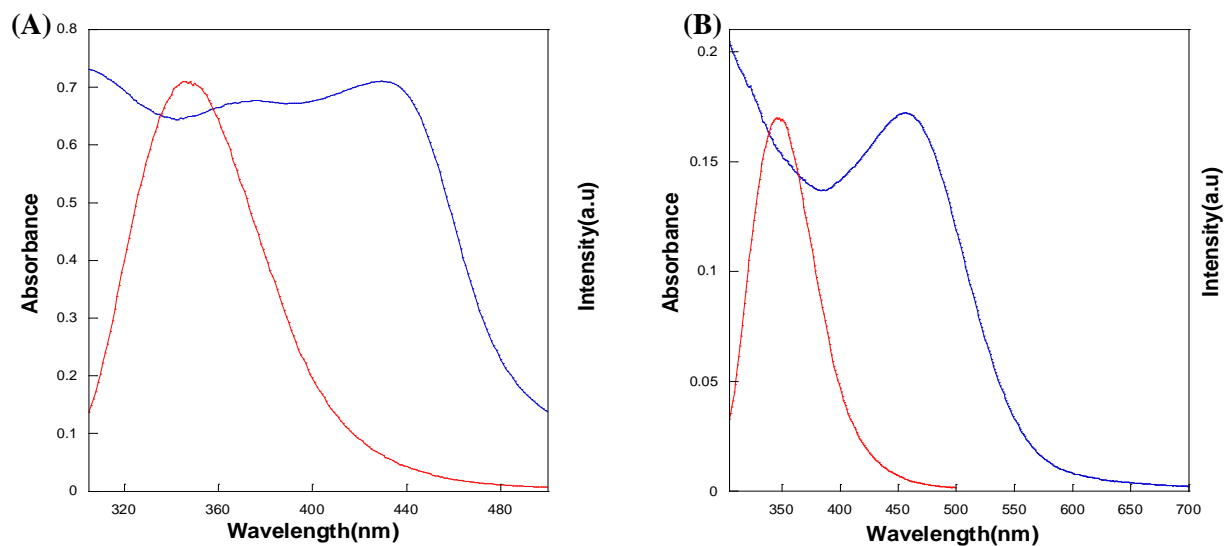

**Fig. S18** The overlap of the fluorescence spectra of BSA (red line) and the absorption spectra (blue line) of (A) compound 2 and (B) compound 3.

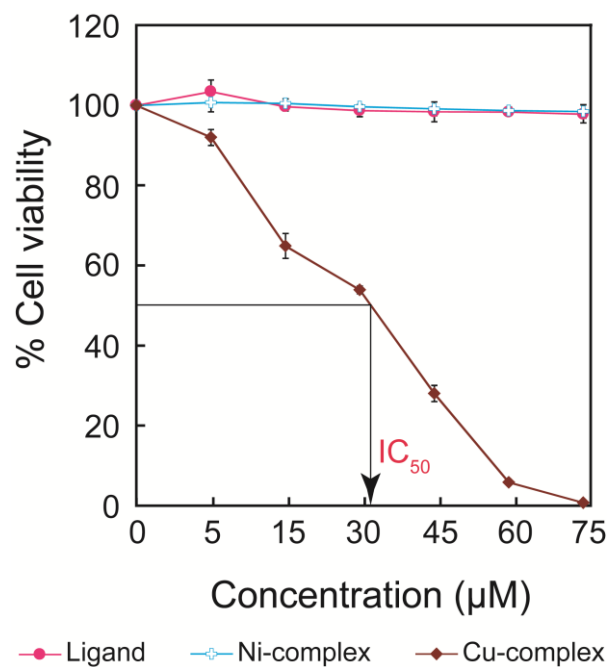

**Fig. S19** Determination of  $\text{IC}_{50}$  value for complex 3.
